# Supplementary material
Source: Springer Nature journal article supplement (https://www.springermedizin.de/resource/supplementary/12967_2011_733_MOESM5_ESM.pdf/9577390)

vehicle 1  
vehicle 2  
vehicle 3  
vehicle 4  
NBD 1  
NBD 2  
NBD 3  
NBD 4  
NBD 5  
NBD 6  
NBD 7

NF- $\kappa$ B

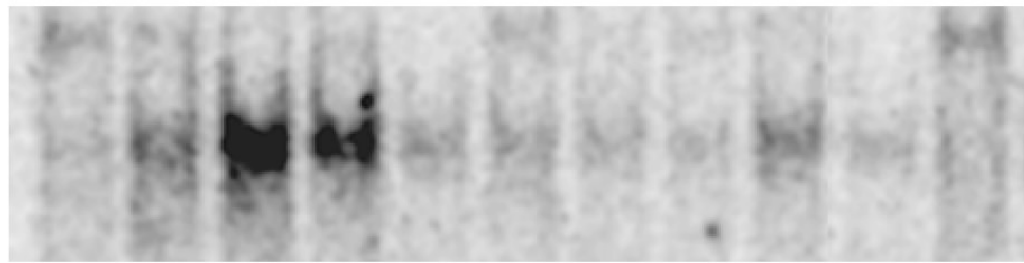

EMSA

p65

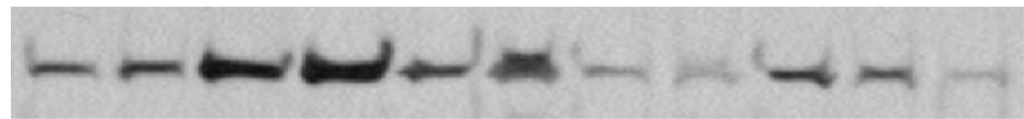

NS

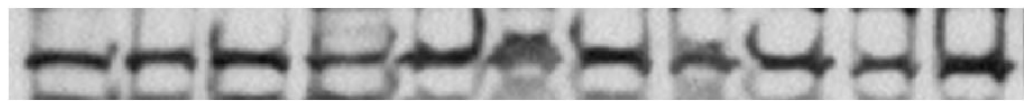

western

Supplement: MOESM5 [file 9577390]
